# Supplementary material for: Comparison of Metabolic Power and Energy Cost of Submaximal and Sprint Running Efforts Using Different Methods in Elite Youth Soccer Players: A Novel Energetic Approach
Source: MDPI journal article supplement (doi:10.3390/s24082577), 2024-04-17
Supplement: s1 [file s1]

Supplementary files for

# Comparison of Metabolic Power and Energy Cost of Submaximal and Sprint Running Efforts Using Different Methods in Elite Youth Soccer Players: A Novel Energetic Approach

Gabriele Grassadonia, Pedro E. Alcaraz and Tomás T. Freitas

| MP     |             |           |             |           |               |               |          |            |      |                 |                 |
|--------|-------------|-----------|-------------|-----------|---------------|---------------|----------|------------|------|-----------------|-----------------|
| Splits | Mean MP_GPS | SD MP_GPS | Mean MP_EMG | SD MP_EMG | CV (%) MP_GPS | CV (%) MP_EMG | p-value  | ES         | F    | CI (95%, lower) | CI (95%, upper) |
| 0-5m   | 54.58       | 10.80     | 46.07       | 10.15     | 19.79%        | 22.04%        | 0.029*   | 0.81\$\$\$ | 1.13 | 2.54            | 14.465          |
| 5-10m  | 62.77       | 11.23     | 53.81       | 8.70      | 17.89%        | 16.16%        | 0.017*   | 0.89\$\$\$ | 1.67 | 2.56            | 15.381          |
| 10-15m | 58.61       | 11.57     | 54.70       | 9.70      | 19.74%        | 17.74%        | 0.308    | 0.37§      | 1.42 | -4.65           | 12.478          |
| 15-20m | 56.88       | 11.83     | 54.78       | 8.91      | 20.80%        | 16.27%        | 0.575    | 0.20§      | 1.76 | -3.89           | 8.086           |
| 20-25m | 52.73       | 11.53     | 55.89       | 8.94      | 21.86%        | 16.00%        | 0.01**   | 0.31§      | 1.66 | -11.72          | 4.195           |
| 25-30m | 44.67       | 8.31      | 56.07       | 7.70      | 18.60%        | 13.73%        | 0.000*** | 1.42\$\$\$ | 1.17 | -15.88          | -6.901          |
| 30-35m | 44.25       | 6.97      | 54.51       | 10.04     | 15.75%        | 18.42%        | 0.002**  | 1.19\$\$\$ | 0.48 | -14.54          | -5.982          |
| 35-40m | 44.08       | 9.17      | 52.79       | 8.56      | 20.81%        | 16.22%        | 0.015*   | 0.98\$\$\$ | 1.15 | -14.59          | -2.23           |
| 40-45m | 44.53       | 9.17      | 49.58       | 9.46      | 20.59%        | 19.08%        | 0.136    | 0.54§§     | 0.94 | -10.6           | 0.519           |
| 45-50m | 41.35       | 11.20     | 39.02       | 9.54      | 27.08%        | 24.46%        | 0.532    | 0.22§      | 1.38 | -2.67           | 7.318           |

**Table S1.** Metabolic Power outcomes and statistical analysis results for the different splits. CV = Coefficient of Variation; EC = Energy cost; ES = Effect size; SD = Standard deviation; \*  $p$ -value  $\leq 0.05$ , \*\*  $p \leq 0.01$ , \*\*\*  $p \leq 0.001$ ; §§ ES  $\geq 0.20$ , §§§ ES  $\geq 0.50$ , §§§§ ES  $\geq 0.80$ .

| EC     |             |           |             |           |               |               |          |            |      |                 |                 |
|--------|-------------|-----------|-------------|-----------|---------------|---------------|----------|------------|------|-----------------|-----------------|
| Splits | Mean EC_GPS | SD EC_GPS | Mean EC_EMG | SD EC_EMG | CV (%) EC_GPS | CV (%) EC_EMG | p-value  | ES         | F    | CI (95%, lower) | CI (95%, upper) |
| 0-5m   | 17.76       | 2.85      | 16.57       | 3.46      | 16.04%        | 20.87%        | 0.296    | 0.38§      | 0.68 | -1.23           | 3.62            |
| 5-10m  | 10.54       | 1.45      | 8.64        | 1.42      | 13.71%        | 16.49%        | 0.001*** | 1.33\$\$\$ | 1.03 | 0.84            | 2.97            |
| 10-15m | 8.59        | 1.45      | 7.69        | 1.43      | 16.89%        | 18.59%        | 0.087    | 0.63§§     | 1.03 | -0.30           | 2.10            |
| 15-20m | 7.67        | 1.33      | 7.17        | 1.16      | 17.32%        | 16.11%        | 0.085    | 0.40§      | 1.32 | -0.50           | 1.38            |
| 20-25m | 6.72        | 1.33      | 6.95        | 1.03      | 19.84%        | 14.86%        | 0.542    | 0.20§      | 1.66 | -1.32           | 0.69            |
| 25-30m | 5.73        | 0.85      | 6.89        | 0.86      | 14.76%        | 12.52%        | 0.02*    | 1.35\$\$\$ | 0.96 | -1.76           | -0.55           |
| 30-35m | 5.78        | 1.00      | 6.87        | 1.29      | 17.38%        | 18.71%        | 0.003**  | 0.95\$\$\$ | 0.61 | -1.58           | -0.61           |
| 35-40m | 5.76        | 1.19      | 6.64        | 1.12      | 20.69%        | 16.80%        | 0.048*   | 0.76§§     | 1.14 | -1.57           | 0.08            |
| 40-45m | 6.02        | 1.16      | 6.41        | 0.92      | 19.20%        | 14.39%        | 0.298    | 0.37§      | 1.57 | -1.04           | 0.26            |
| 45-50m | 5.94        | 1.28      | 5.35        | 0.77      | 21.56%        | 14.36%        | 0.124    | 0.56§§     | 2.78 | -0.15           | 1.33            |

**Table S2.** Energy Cost outcomes and statistical analysis results for the different splits. \*  $p$ -value  $\leq 0.05$ , \*\*  $p \leq 0.01$ , \*\*\*  $p \leq 0.001$ ; § ES  $\geq 0.20$ , §§ ES  $\geq 0.50$ , §§§ ES  $\geq 0.80$ .
